# Supplementary material
Source: Frontiers journal article supplement (https://www.frontiersin.org/articles/525687)
Supplement: Table_2.DOCX [file Table_2.DOCX]

Table S2 Number of successfully genotyped SNPs and average coverage depth for each individual of *E. japonicas* in this study.

|  |  |  |  |  |  |
| --- | --- | --- | --- | --- | --- |
| INDV | N_SITES | MEAN_DEPTH | INDV | N_SITES | MEAN_DEPTH |
| BHW-10_1 | 9157 | 13.83 | OWA-6_1 | 9623 | 21.86 |
| BHW-11_1 | 9596 | 18.36 | OWA-8_1 | 9290 | 14.31 |
| BHW-12_1 | 9171 | 13.47 | OWA-9_1 | 8878 | 12.39 |
| BHW-13_1 | 9473 | 18.38 | OWB-1_1 | 9550 | 19.19 |
| BHW-14_1 | 9034 | 13.09 | OWB-10_1 | 9262 | 15.05 |
| BHW-15_1 | 8852 | 12.58 | OWB-11_1 | 9492 | 16.17 |
| BHW-16_1 | 8989 | 12.19 | OWB-12_1 | 9213 | 13.45 |
| BHW-17_1 | 9421 | 16.00 | OWB-13_1 | 9720 | 19.27 |
| BHW-18_1 | 8818 | 11.54 | OWB-14_1 | 9012 | 12.17 |
| BHW-19_1 | 9497 | 16.76 | OWB-17_1 | 9023 | 12.98 |
| BHW-2_1 | 11718 | 13.66 | OWB-18_1 | 9528 | 21.51 |
| BHW-20_1 | 9094 | 12.49 | OWB-19_1 | 9498 | 15.66 |
| BHW-21_1 | 9393 | 15.57 | OWB-2_1 | 11423 | 12.95 |
| BHW-22_1 | 9575 | 19.64 | OWB-20_1 | 9342 | 15.12 |
| BHW-3_1 | 9452 | 16.02 | OWB-23_1 | 9148 | 13.20 |
| BHW-4_1 | 9682 | 28.04 | OWB-24_1 | 9508 | 17.87 |
| BHW-5_1 | 9562 | 18.43 | OWB-3_1 | 9556 | 17.32 |
| BHW-7_1 | 9587 | 20.42 | OWB-4_1 | 9646 | 23.68 |
| BHW-8_1 | 9101 | 13.98 | OWB-5_1 | 9425 | 14.40 |
| BHW-9_1 | 9517 | 18.81 | OWB-6_1 | 9482 | 18.51 |
| CHB-10_1 | 9277 | 20.54 | OWB-7_1 | 9676 | 17.88 |
| CHB-11_1 | 9046 | 17.71 | OWB-8_1 | 8967 | 11.88 |
| CHB-12_1 | 7987 | 12.41 | OWB-9_1 | 9565 | 21.06 |
| CHB-13_1 | 8983 | 18.22 | OWC-10_1 | 9508 | 19.05 |
| CHB-14_1 | 9023 | 17.05 | OWC-11_1 | 9628 | 19.36 |
| CHB-15_1 | 9399 | 21.69 | OWC-13_1 | 9576 | 18.34 |
| CHB-16_1 | 9176 | 16.78 | OWC-15_1 | 9316 | 15.31 |
| CHB-17_1 | 9412 | 23.63 | OWC-16_1 | 9673 | 22.79 |
| CHB-18_1 | 9359 | 19.49 | OWC-17_1 | 9591 | 22.24 |
| CHB-21_1 | 9501 | 15.22 | OWC-18_1 | 9619 | 20.78 |
| CHB-22_1 | 9501 | 25.80 | OWC-19_1 | 9501 | 16.39 |
| CHB-23_1 | 9633 | 19.81 | OWC-2_1 | 9483 | 17.12 |
| CHB-25_1 | 9625 | 23.70 | OWC-20_1 | 9106 | 12.44 |
| CHB-26_1 | 9506 | 17.47 | OWC-21_1 | 9417 | 16.92 |
| CHB-28_1 | 9362 | 15.72 | OWC-22_1 | 9664 | 24.16 |
| CHB-29_1 | 9463 | 17.81 | OWC-23_1 | 9221 | 14.26 |
| CHB-3_1 | 9083 | 17.70 | OWC-3_1 | 9392 | 17.07 |
| CHB-30_1 | 9542 | 18.60 | OWC-4_1 | 9612 | 22.98 |
| CHB-4_1 | 9396 | 20.69 | OWC-5_1 | 9559 | 17.84 |
| CHB-9_1 | 9957 | 12.76 | OWC-6_1 | 9658 | 21.06 |
| DL-1_1 | 9050 | 16.35 | OWC-7_1 | 11564 | 13.58 |
| DL-10_1 | 9225 | 18.60 | OWC-8_1 | 9554 | 18.34 |
| DL-11_1 | 9385 | 28.57 | OWC-9_1 | 9425 | 15.70 |
| DL-12_1 | 9421 | 33.51 | OWD-1_1 | 9589 | 20.29 |
| DL-13_1 | 9504 | 24.68 | OWD-11_1 | 8850 | 12.07 |
| DL-14_1 | 9427 | 19.00 | OWD-12_1 | 8914 | 12.50 |
| DL-15_1 | 8728 | 13.27 | OWD-13_1 | 8796 | 11.67 |
| DL-17_1 | 9434 | 14.35 | OWD-15_1 | 9602 | 19.61 |
| DL-18_1 | 9530 | 21.12 | OWD-16_1 | 9317 | 15.37 |
| DL-2_1 | 9111 | 17.24 | OWD-17_1 | 8627 | 11.66 |
| DL-21_1 | 9273 | 13.61 | OWD-18_1 | 9582 | 19.18 |
| DL-25_1 | 9356 | 14.21 | OWD-19_1 | 9058 | 12.98 |
| DL-26_1 | 11617 | 13.02 | OWD-2_1 | 8525 | 10.63 |
| DL-28_1 | 9563 | 22.44 | OWD-20_1 | 9489 | 15.44 |
| DL-29_1 | 9302 | 13.59 | OWD-21_1 | 9551 | 22.87 |
| DL-3_1 | 8989 | 14.45 | OWD-22_1 | 9613 | 24.69 |
| DL-30_1 | 9603 | 20.36 | OWD-23_1 | 9444 | 16.59 |
| DL-4_1 | 9403 | 21.75 | OWD-24_1 | 9140 | 13.56 |
| DL-7_1 | 9483 | 29.94 | OWD-3_1 | 9418 | 15.47 |
| DL-8_1 | 9295 | 22.44 | OWD-6_1 | 9604 | 24.66 |
| EHM-1_1 | 11497 | 13.22 | OWD-7_1 | 9564 | 29.97 |
| EHM-10_1 | 9456 | 20.00 | OWD-8_1 | 11567 | 13.90 |
| EHM-11_1 | 9212 | 14.38 | OWD-9_1 | 9103 | 12.83 |
| EHM-12_1 | 9558 | 18.92 | PH-1_1 | 9669 | 34.32 |
| EHM-13_1 | 9480 | 18.66 | PH-10_1 | 9501 | 13.90 |
| EHM-14_1 | 9436 | 16.58 | PH-11_1 | 9675 | 20.56 |
| EHM-15_1 | 9594 | 20.68 | PH-12_1 | 9720 | 20.45 |
| EHM-16_1 | 9290 | 14.77 | PH-2_1 | 11904 | 14.72 |
| EHM-17_1 | 9483 | 17.57 | PH-3_1 | 9418 | 15.34 |
| EHM-18_1 | 9696 | 24.26 | PH-4_1 | 9619 | 19.71 |
| EHM-19_1 | 9199 | 12.65 | PH-5_1 | 9624 | 20.26 |
| EHM-2_1 | 9681 | 24.04 | PH-6_1 | 9721 | 22.52 |
| EHM-20_1 | 9522 | 18.01 | PH-7_1 | 9196 | 11.78 |
| EHM-3_1 | 9574 | 15.59 | PH-8_1 | 9721 | 20.22 |
| EHM-4_1 | 9501 | 21.83 | PH-9_1 | 9710 | 19.75 |
| EHM-5_1 | 9583 | 20.78 | QHD-1_1 | 9529 | 16.38 |
| EHM-6_1 | 9242 | 13.92 | QHD-10_1 | 9354 | 16.58 |
| EHM-7_1 | 9431 | 14.74 | QHD-11_1 | 9152 | 13.79 |
| EHM-8_1 | 9298 | 14.10 | QHD-12_1 | 9344 | 15.98 |
| EHM-9_1 | 9475 | 14.75 | QHD-14_1 | 9465 | 16.76 |
| HZW-1_1 | 9558 | 15.91 | QHD-15_1 | 9332 | 15.25 |
| HZW-10_1 | 9452 | 17.23 | QHD-16_1 | 9251 | 13.40 |
| HZW-11_1 | 9478 | 16.62 | QHD-17_1 | 9455 | 15.37 |
| HZW-12_1 | 9274 | 13.90 | QHD-18_1 | 9351 | 13.80 |
| HZW-13_1 | 9199 | 13.57 | QHD-19_1 | 9492 | 16.02 |
| HZW-15_1 | 9509 | 16.57 | QHD-2_1 | 9472 | 16.45 |
| HZW-16_1 | 9565 | 19.70 | QHD-20_1 | 9513 | 18.20 |
| HZW-19_1 | 9420 | 17.57 | QHD-21_1 | 9338 | 14.57 |
| HZW-2_1 | 9632 | 19.32 | QHD-22_1 | 9656 | 17.03 |
| HZW-20_1 | 9643 | 21.98 | QHD-24_1 | 9504 | 17.79 |
| HZW-21_1 | 9450 | 17.86 | QHD-4_1 | 9566 | 19.07 |
| HZW-22_1 | 9599 | 21.32 | QHD-5_1 | 11573 | 12.94 |
| HZW-23_1 | 8786 | 11.84 | QHD-6_1 | 9536 | 18.94 |
| HZW-3_1 | 9518 | 16.99 | QHD-7_1 | 9372 | 16.49 |
| HZW-4_1 | 9565 | 17.48 | QHD-9_1 | 9653 | 18.08 |
| HZW-5_1 | 9503 | 16.70 | RS-10_1 | 5673 | 9.63 |
| HZW-6_1 | 9639 | 24.41 | RS-11_1 | 8403 | 14.83 |
| HZW-7_1 | 11828 | 15.63 | RS-12_1 | 8358 | 14.45 |
| HZW-8_1 | 9547 | 36.36 | RS-13_1 | 6774 | 10.82 |
| HZW-9_1 | 9559 | 24.35 | RS-14_1 | 8737 | 16.04 |
| LDW-1_1 | 9405 | 17.85 | RS-15_1 | 7059 | 11.08 |
| LDW-10_1 | 9483 | 19.47 | RS-16_1 | 9265 | 20.63 |
| LDW-11_1 | 9296 | 15.24 | RS-20_1 | 9468 | 18.62 |
| LDW-12_1 | 9338 | 15.67 | RS-21_1 | 9645 | 21.70 |
| LDW-13_1 | 9299 | 15.20 | RS-22_1 | 9481 | 17.23 |
| LDW-14_1 | 11827 | 14.54 | RS-24_1 | 9514 | 20.54 |
| LDW-15_1 | 9461 | 20.56 | RS-25_1 | 9656 | 16.99 |
| LDW-16_1 | 9081 | 12.85 | RS-26_1 | 11904 | 14.51 |
| LDW-17_1 | 9578 | 20.19 | RS-27_1 | 9401 | 14.86 |
| LDW-18_1 | 9026 | 12.58 | RS-30_1 | 9315 | 13.29 |
| LDW-19_1 | 9544 | 20.68 | RS-5_1 | 9446 | 22.86 |
| LDW-2_1 | 7514 | 9.33 | RS-6_1 | 9103 | 18.34 |
| LDW-20_1 | 9525 | 19.12 | RS-7_1 | 7333 | 12.03 |
| LDW-3_1 | 9248 | 14.47 | RS-8_1 | 9103 | 17.66 |
| LDW-4_1 | 9491 | 16.25 | RS-9_1 | 9414 | 21.68 |
| LDW-5_1 | 8926 | 12.34 | SZO-10_1 | 9579 | 19.65 |
| LDW-6_1 | 9332 | 15.62 | SZO-12_1 | 9299 | 13.53 |
| LDW-7_1 | 9574 | 26.90 | SZO-13_1 | 9532 | 20.15 |
| LDW-8_1 | 9486 | 19.67 | SZO-14_1 | 9448 | 15.66 |
| LDW-9_1 | 9363 | 15.10 | SZO-17_1 | 9564 | 21.41 |
| LZW-1_1 | 9513 | 14.78 | SZO-18_1 | 9583 | 22.39 |
| LZW-10_1 | 8931 | 12.29 | SZO-19_1 | 9430 | 17.37 |
| LZW-11_1 | 11495 | 13.60 | SZO-20_1 | 9606 | 20.83 |
| LZW-14_1 | 9238 | 12.90 | SZO-22_1 | 9464 | 21.38 |
| LZW-15_1 | 9245 | 14.53 | SZO-23_1 | 9520 | 17.51 |
| LZW-17_1 | 9083 | 13.09 | SZO-24_1 | 9568 | 22.19 |
| LZW-18_1 | 9222 | 13.50 | SZO-25_1 | 9652 | 29.13 |
| LZW-19_1 | 9563 | 19.21 | SZO-26_1 | 10906 | 12.05 |
| LZW-2_1 | 9538 | 18.31 | SZO-27_1 | 9315 | 14.06 |
| LZW-20_1 | 8912 | 12.35 | SZO-31_1 | 9433 | 15.81 |
| LZW-21_1 | 9509 | 19.91 | SZO-32_1 | 9618 | 16.43 |
| LZW-22_1 | 8629 | 11.03 | SZO-5_1 | 9167 | 12.55 |
| LZW-23_1 | 9315 | 14.84 | SZO-6_1 | 9575 | 15.70 |
| LZW-24_1 | 9461 | 18.88 | SZO-8_1 | 9586 | 16.00 |
| LZW-3_1 | 8711 | 11.59 | SZO-9_1 | 9495 | 17.45 |
| LZW-4_1 | 9003 | 12.22 | TDR-10_1 | 9564 | 19.00 |
| LZW-5_1 | 9496 | 17.46 | TDR-12_1 | 9643 | 32.93 |
| LZW-6_1 | 9471 | 18.06 | TDR-13_1 | 9614 | 17.21 |
| LZW-8_1 | 9426 | 17.63 | TDR-14_1 | 9749 | 20.19 |
| LZW-9_1 | 9515 | 18.28 | TDR-16_1 | 9719 | 29.24 |
| MYG-1_1 | 9533 | 20.41 | TDR-17_1 | 9562 | 21.08 |
| MYG-11_1 | 9369 | 16.39 | TDR-18_1 | 9641 | 20.79 |
| MYG-16_1 | 9211 | 14.52 | TDR-19_1 | 9614 | 17.68 |
| MYG-17_1 | 9271 | 14.00 | TDR-20_1 | 9536 | 14.71 |
| MYG-18_1 | 8947 | 12.21 | TDR-21_1 | 9344 | 15.54 |
| MYG-19_1 | 9556 | 23.17 | TDR-22_1 | 11910 | 14.74 |
| MYG-2_1 | 8905 | 12.11 | TDR-23_1 | 9370 | 14.39 |
| MYG-20_1 | 8596 | 11.23 | TDR-24_1 | 9620 | 17.21 |
| MYG-21_1 | 9083 | 12.82 | TDR-25_1 | 9221 | 13.78 |
| MYG-22_1 | 9624 | 26.32 | TDR-3_1 | 9668 | 24.24 |
| MYG-24_1 | 9522 | 20.08 | TDR-5_1 | 9535 | 18.83 |
| MYG-25_1 | 9531 | 23.42 | TDR-6_1 | 9439 | 14.93 |
| MYG-26_1 | 9598 | 15.51 | TDR-7_1 | 9263 | 14.18 |
| MYG-27_1 | 8157 | 10.30 | TDR-8_1 | 8918 | 11.78 |
| MYG-28_1 | 9489 | 42.95 | YL-10_1 | 9757 | 19.20 |
| MYG-29_1 | 9362 | 17.48 | YL-11_1 | 11828 | 14.58 |
| MYG-30_1 | 9439 | 18.02 | YL-12_1 | 9389 | 13.35 |
| MYG-4_1 | 9651 | 39.29 | YL-14_1 | 9729 | 22.40 |
| MYG-5_1 | 9506 | 19.81 | YL-16_1 | 9538 | 14.34 |
| MYG-7_1 | 11757 | 15.55 | YL-19_1 | 9675 | 19.24 |
| NNC-1_1 | 9690 | 20.48 | YL-2_1 | 9482 | 14.01 |
| NNC-10_1 | 9645 | 18.97 | YL-20_1 | 9421 | 14.08 |
| NNC-11_1 | 9699 | 17.88 | YL-21_1 | 9583 | 16.88 |
| NNC-12_1 | 9638 | 24.54 | YL-22_1 | 9584 | 15.85 |
| NNC-13_1 | 9467 | 17.29 | YL-23_1 | 9520 | 13.91 |
| NNC-14_1 | 9730 | 22.72 | YL-24_1 | 9525 | 15.64 |
| NNC-15_1 | 9745 | 25.30 | YL-27_1 | 9663 | 37.14 |
| NNC-16_1 | 9470 | 14.64 | YL-28_1 | 9745 | 24.48 |
| NNC-17_1 | 9693 | 27.95 | YL-29_1 | 9600 | 34.14 |
| NNC-18_1 | 9677 | 24.35 | YL-3_1 | 9599 | 16.64 |
| NNC-2_1 | 9673 | 26.43 | YL-4_1 | 9479 | 13.84 |
| NNC-3_1 | 9592 | 18.65 | YL-5_1 | 9732 | 18.86 |
| NNC-4_1 | 9589 | 25.52 | YL-6_1 | 9652 | 21.56 |
| NNC-5_1 | 9105 | 12.92 | YL-8_1 | 9670 | 18.02 |
| NNC-6_1 | 9105 | 14.15 | YRE-10_1 | 9621 | 37.87 |
| NNC-7_1 | 9463 | 18.69 | YRE-11_1 | 9468 | 32.97 |
| NNC-8_1 | 11958 | 17.13 | YRE-12_1 | 10634 | 13.25 |
| NNC-9_1 | 9703 | 27.80 | YRE-13_1 | 9379 | 24.17 |
| OWA-1_1 | 9538 | 22.14 | YRE-14_1 | 9444 | 28.53 |
| OWA-10_1 | 9522 | 19.17 | YRE-15_1 | 9411 | 33.22 |
| OWA-11_1 | 9507 | 19.08 | YRE-16_1 | 9318 | 18.49 |
| OWA-12_1 | 9517 | 22.52 | YRE-19_1 | 9529 | 33.76 |
| OWA-13_1 | 9426 | 17.09 | YRE-2_1 | 9098 | 13.79 |
| OWA-14_1 | 9336 | 14.84 | YRE-20_1 | 9534 | 23.55 |
| OWA-16_1 | 9630 | 18.14 | YRE-22_1 | 9537 | 19.40 |
| OWA-18_1 | 9325 | 14.38 | YRE-23_1 | 9593 | 25.95 |
| OWA-2_1 | 9580 | 20.70 | YRE-24_1 | 9363 | 14.79 |
| OWA-21_1 | 9540 | 22.86 | YRE-26_1 | 9660 | 18.91 |
| OWA-22_1 | 9585 | 20.95 | YRE-27_1 | 9697 | 24.07 |
| OWA-23_1 | 9365 | 14.54 | YRE-28_1 | 9467 | 16.49 |
| OWA-24_1 | 8954 | 12.28 | YRE-29_1 | 9548 | 20.66 |
| OWA-25_1 | 9055 | 12.35 | YRE-5_1 | 9391 | 19.68 |
| OWA-3_1 | 11875 | 15.23 | YRE-6_1 | 9256 | 18.02 |
| OWA-4_1 | 9238 | 13.78 | YRE-8_1 | 9026 | 15.03 |
| OWA-5_1 | 9386 | 15.57 |  |  |  |
|  |  |  |  |  |  |
